# Supplementary material
Source: PubMed Central journal article supplement (PMC8979944)
Supplement: 41598_2022_9316_MOESM4_ESM.pdf [file 41598_2022_9316_MOESM4_ESM.pdf]

Supplemental Table 1. Descriptive statistics of the four cohorts (N=69,136).

| Variables                           |                   | DNBC          |                | TEMPO       |             | Constances**      |                   | UCL Covid-19 Social Study* |             |             |
|-------------------------------------|-------------------|---------------|----------------|-------------|-------------|-------------------|-------------------|----------------------------|-------------|-------------|
|                                     |                   | Young people  | Women          | Men         | Women       | Men               | Women             | Young people               | Men         | Women       |
| <b>N</b>                            |                   | 9,205         | 12,684         | 140         | 284         | 13,919            | 14,252            | 499                        | 4,561       | 13,592      |
| <b>Age</b>                          | Mean (SD)         | 20 (1)        | 50 (4)         | 40 (3)      | 40 (4)      | 52.3% (51.9;52.7) | 50.4% (50.0;50.7) | 22 (2.26)                  | 55 (15)     | 49 (15)     |
|                                     | Median (Q1, Q3)   | 20 (19;21)    | 50 (47;53)     | 41 (38; 43) | 41 (38; 42) | 51.4% (50.8;52.1) | 49.2% (48.6;49.8) | 22 (20; 24)                | 56 (42; 68) | 48 (36; 61) |
| <b>Age categories</b>               | <20               | 5,362 (58.3%) | -              | -           | -           | -                 | -                 | 23.2%                      | -           | -           |
|                                     | 20-25             | 3,843 (41.7%) | -              | -           | -           | -                 | -                 | 76.8%                      | -           | -           |
|                                     | 26-34             | -             | -              | 10 (7.1%)   | 26 (9.2%)   | 1,079 (12.3%)     | 1,393 (16.3%)     | -                          | 13.7%       | 21.9%       |
|                                     | 35-44             | -             | 779 (6.8%)     | 118 (84.3%) | 241 (84.9%) | 2,553 (20.4%)     | 2,970 (21.03%)    | -                          | 15.8%       | 20.8%       |
|                                     | 45-54             | -             | 8,670 (75.9%)  | 12 (8.6%)   | 17 (6.0%)   | 2,884 (21.9%)     | 3,274 (22.0%)     | -                          | 18.4%       | 21.7%       |
|                                     | 55-64             | -             | 1,964 (17.2%)  | -           | -           | 3,306 (18.9%)     | 3,442 (20.5%)     | -                          | 18.3%       | 16.5%       |
| <b>Sex</b>                          | Female            | 6,333 (68.8%) | 12,684 (100%)  | -           | 284 (100%)  | -                 | 100%              | 60.2%                      | -           | 100%        |
|                                     | Male              | 2,872 (31.2%) | -              | 140 (100%)  | -           | 100%              | -                 | 39.8%                      | 100%        | -           |
| <b>Educational attainment</b>       | Lower secondary   | 4,647 (50.5%) | 179 (1.4%)     | 5 (3.6%)    | 4 (1.4%)    | 7.3% (6.5;8.2)    | 6.5% (5.8;7.3)    | 17.3%                      | 37.5%       | 32.2%       |
|                                     | Upper secondary   | 4,445 (48.3%) | 4,051 (31.9%)  | 14 (10.0%)  | 21 (7.5%)   | 39.5% (38.1;40.9) | 29.8% (28.6;30.9) | 54.4%                      | 31.3%       | 30.5%       |
|                                     | Tertiary          | 39 (0.4%)     | 8,408 (66.3%)  | 121 (86.4%) | 257 (91.1%) | 53.0% (51.6;54.4) | 63.6% (62.3;64.8) | 28.3%                      | 31.2%       | 37.2%       |
|                                     | 65+               | 74 (0.8%)     | 3 (0.0%)       | -           | -           | 4.0% (2.6;2%)     | 3.1% (2.0;0%)     | -                          | 33.8%       | 19.1%       |
|                                     | Other             | 46 (0.4%)     | -              | -           | -           | -                 | -                 | -                          | -           | -           |
| <b>NCD diagnosis</b>                | No                | 7,862 (85.4%) | 8,907 (70.2%)  | 64 (45.7%)  | 127 (44.7%) | 56.1% (54.7;57.4) | 58.5% (57.3;59.6) | 62.7%                      | 52.2%       | 58.5%       |
|                                     | Yes               | 1,343 (14.6%) | 3,777 (29.8%)  | 76 (54.3%)  | 157 (55.3%) | 43.8% (42.5;45.2) | 41.4% (40.3;42.6) | 37.3%                      | 47.8%       | 41.5%       |
| <b>Psychiatric diagnosis at any</b> | No                | 7,495 (81.4%) | 11,438 (90.2%) | 126 (90.0%) | 244 (85.9%) | 95.7% (95.2;96.3) | 96.1% (95.6;96.5) | 72.4%                      | 85.7%       | 78.4%       |
|                                     | Yes               | 1,710 (18.6%) | 1,246 (9.8%)   | 14 (10.0%)  | 40 (14.1%)  | 4.2% (3.6;4.7)    | 3.8% (3.4;4.3)    | 27.6%                      | 14.3%       | 21.7%       |
| <b>Direct access to outdoor</b>     | No                | 325 (3.5%)    | 98 (0.8%)      | 87 (62.1%)  | 193 (68.0%) | 8.4% (7.7;9.1)    | 7.9% (7.2;8.5)    | 25.6%                      | 14.4%       | 13.4%       |
|                                     | Yes               | 8,880 (96.5%) | 12,586(99.2%)  | 53 (37.9%)  | 91 (32.0%)  | 91.5% (90.8;92.2) | 92.0% (91.4;92.7) | 74.4%                      | 85.6%       | 86.6%       |
| <b>Household density</b>            | <43 m2            | 6,198 (67.3%) | 6,922 (54.6%)  | -           | -           | 28.3% (27.0;29.5) | 28.2% (27.1;29.3) | -                          | -           | -           |
|                                     | ≥43 m2            | 3,007 (32.7%) | 5,762 (45.4%)  | -           | -           | 71.7% (70.5;73.0) | 71.8% (70.6;73.1) | -                          | -           | -           |
| <b>Household crowding</b>           | Ideal             | -             | -              | -           | -           | 35.5% (34.2;36.8) | 36.8% (35.7;38.0) | 28.7%                      | 24.1%       | 22.4%       |
|                                     | Crowded           | -             | -              | -           | -           | 5.0% (4.3;5.6)    | 4.9% (4.4;5.5)    | 28.5%                      | 6.6%        | 6.9%        |
| <b>Household composition</b>        | Under-occupied    | -             | -              | -           | -           | 59.4% (58.1;60.7) | 58.1% (56.9;59.3) | 42.8%                      | 69.3%       | 70.7%       |
|                                     | Single            | 459 (10.9%)   | 337 (10.8%)    | 26 (18.6%)  | 19 (6.7%)   | 15.2% (14.2;16.1) | 16.2% (15.3;17.1) | 8.3%                       | 20.6%       | 19.0%       |
| <b>Urbanicity</b>                   | With children     | 1,426 (33.9%) | 1,500 (47.9%)  | 89 (63.6%)  | 227 (79.9%) | 30.2% (29.0;31.4) | 33.5% (32.4;34.7) | 23.3%                      | 19.1%       | 29.4%       |
|                                     | Adults only       | 2,325 (55.2%) | 1,296 (41.4%)  | 25 (17.9%)  | 38 (13.4%)  | 54.5% (53.1;55.8) | 50.1% (48.9;51.3) | 68.4%                      | 60.3%       | 51.6%       |
| <b>Loneliness</b>                   | Urban             | 3,229 (35.1%) | 3,808 (30.0%)  | 100 (71.4%) | 218 (76.8%) | 79.5% (78.4;80.7) | 77.7% (76.7;78.7) | 53.4%                      | 32.3%       | 32.4%       |
|                                     | Semi-urban        | 2,045 (22.2%) | 3,186 (25.1%)  | 24 (17.1%)  | 31 (10.9%)  | -                 | -                 | 33.8%                      | 45.0%       | 46.9%       |
| <b>Life satisfaction</b>            | Rural             | 3,931 (42.7%) | 5,686 (44.8%)  | 16 (11.4%)  | 35 (12.3%)  | 20.4% (19.2;21.5) | 22.2% (21.2;23.2) | 12.7%                      | 22.7%       | 20.6%       |
|                                     | Not lonely        | 2,707 (29.4%) | 7,075 (55.8%)  | 83 (59.3%)  | 167 (58.8%) | 3.9% (3.3;4.5)    | 4.2% (3.7;4.7)    | 32.5%                      | 58.4%       | 48.4%       |
| <b>Anxiety</b>                      | Moderately lonely | 4,255 (46.2%) | 4,801 (37.9%)  | 46 (32.9%)  | 99 (34.9%)  | 6.6% (5.9;7.3)    | 9.8% (9.1;10.5)   | 37.9%                      | 25.8%       | 31.5%       |
|                                     | Very lonely       | 2,243 (24.4%) | 808 (6.4%)     | 11 (7.9%)   | 18 (6.3%)   | 89.3% (88.5;90.2) | 85.8% (85.0;86.7) | 29.6%                      | 15.8%       | 20.1%       |
|                                     | Low               | 3,402 (37.0%) | -              | -           | -           | -                 | -                 | 46.7%                      | -           | -           |
| <b>Life satisfaction</b>            | Medium            | 4,759 (51.7%) | -              | -           | -           | -                 | -                 | 45.9%                      | -           | -           |
|                                     | High              | 1,044 (11.3%) | -              | -           | -           | -                 | -                 | 7.4%                       | -           | -           |
|                                     | Suffering         | -             | 1,691 (13.3%)  | 4 (2.9%)    | 7 (2.5%)    | -                 | -                 | -                          | 21.4%       | 25.2%       |
|                                     | Struggling        | -             | 3,098 (24.4%)  | 29 (20.7%)  | 50 (17.6%)  | -                 | -                 | -                          | 25.4%       | 28.3%       |
| <b>Anxiety</b>                      | Thriving          | -             | 7,895 (62.2%)  | 107 (76.4%) | 227 (79.9%) | -                 | -                 | -                          | 53.2%       | 46.0%       |
|                                     | No/mild           | 4,329 (47.0%) | 7,317 (57.7%)  | -           | -           | 94.6% (93.9;95.2) | 90.6% (89.9;91.3) | 72.0%                      | 87.1%       | 77.3%       |
|                                     | Moderate          | 2,646 (28.7%) | 3,585 (28.3%)  | -           | -           | 3.5% (3.0;4.0)    | 6.3% (5.7;6.9)    | 11.8%                      | 17.6%       | 13.3%       |
| <b>Life satisfaction</b>            | Severe            | 2,230 (24.2%) | 1,782 (14.0%)  | -           | -           | 1.8% (1.4;2.2)    | 2.9% (2.5;3.3)    | 16.1%                      | 5.4%        | 9.4%        |

\*For Constances and the UCL COVID-19 Social Study, only percentages are reported, as due to the weighting strategy, the effective sample sizes do not equate to the actual sample sizes.

\*\*For Constances, percentages are reported with 95% confidence intervals.
