# Supplementary material
Source: PubMed Central journal article supplement (PMC8979944)
Supplement: 41598_2022_9316_MOESM5_ESM.pdf [file 41598_2022_9316_MOESM5_ESM.pdf]

**Supplemental Table 2. Odds ratios for reporting severe loneliness / severe anxiety / low life satisfaction compared to the reference values in the four cohorts (N=69,136) using four different models. Unadjusted model.**

| <b>LONELINESS</b>                   |                                  |                     |                     |                   |                      |                       |                     |                           |                     |                     |
|-------------------------------------|----------------------------------|---------------------|---------------------|-------------------|----------------------|-----------------------|---------------------|---------------------------|---------------------|---------------------|
| Exposure                            |                                  | DNBC                |                     | TEMPO             |                      | Constances            |                     | UCL Covid-19 Social Study |                     |                     |
|                                     |                                  | Young people        | Women               | Men               | Women                | Men                   | Women               | Young people              | Men                 | Women               |
| <b>Access to outdoor facilities</b> | Yes                              | Ref                 | Ref                 | Ref               | Ref                  | Ref                   | Ref                 | Ref                       | Ref                 | Ref                 |
|                                     | No                               | 1.16<br>[0.94,1.42] | 3.41<br>[2.03,5.71] | 0.5 [0.25, 0.99]  | 1.31<br>[0.79, 2.19] | 2.34<br>[1.98,2.75]   | 1.84<br>[1.58,2.14] | 2.48<br>[1.15,5.36]       | 1.26<br>[0.97,1.63] | 1.21<br>[1.02,1.44] |
| <b>Household density</b>            | <43 m2                           | Ref                 | Ref                 | N/A               | N/A                  | Ref                   | Ref                 | N/A                       | N/A                 | N/A                 |
|                                     | ≥43 m2                           | 0.95<br>[0.89,1.03] | 1.23<br>[1.15,1.32] | N/A               | N/A                  | 0.90<br>[0.79,1.03]   | 1.02<br>[0.92,1.14] | N/A                       | N/A                 | N/A                 |
| <b>Household crowding</b>           | Ideal                            | N/A                 | N/A                 | N/A               | N/A                  | Ref                   | Ref                 | Ref                       | Ref                 | Ref                 |
|                                     | Crowded                          | N/A                 | N/A                 | N/A               | N/A                  | 1.43<br>[1.12,1.83]   | 1.15<br>[0.92,1.44] | 0.63<br>[0.32,1.24]       | 1.32<br>[0.89,1.94] | 1.44<br>[1.10,1.87] |
|                                     | Underoccupied                    | N/A                 | N/A                 | N/A               | N/A                  | 0.42<br>[0.37,0.47]   | 0.60<br>[0.54,0.66] | 1.08<br>[0.57,2.03]       | 0.62<br>[0.50,0.78] | 0.67<br>[0.59,0.77] |
| <b>Household composition</b>        | Adults-only households           | Ref                 | Ref                 | Ref               | Ref                  | Ref                   | Ref                 | Ref                       | Ref                 | Ref                 |
|                                     | Households with children         | 1.00<br>[0.89,1.12] | 0.84<br>[0.72,0.97] | 0.74 [0.31, 1.83] | 1.3 [0.65, 2.72]     | 1.20<br>[1.01,1.41]   | 1.27<br>[0.99,1.61] | 2.16<br>[1.11,4.18]       | 1.27<br>[1.00,1.59] | 1.31<br>[1.16,1.48] |
|                                     | Single households (living alone) | 1.63<br>[1.32,2.00] | 2.62<br>[2.07,3.31] | 1 [0.34, 2.95]    | 3.76 [1.21, 11.96]   | 10.19<br>[8.88,11.70] | 7.39<br>[6.04,9.03] | 2.35<br>[0.61,9.04]       | 3.33<br>[2.68,4.12] | 2.21<br>[1.92,2.53] |
| <b>Dwelling type</b>                | House                            | N/A                 | N/A                 | Ref               | Ref                  | Ref                   | Ref                 | Ref                       | Ref                 | Ref                 |
|                                     | Apartment                        | N/A                 | N/A                 | 1.68 [0.84, 3.33] | 0.67 [0.39, 1.12]    | 2.38<br>[2.11,2.67]   | 1.79<br>[1.63,1.98] | 0.95<br>[0.45,2.00]       | 0.90<br>[0.70,1.15] | 0.99<br>[0.85,1.16] |
| <b>Urbanicity</b>                   | Urban                            | Ref                 | Ref                 | Ref               | Ref                  | Ref                   | Ref                 | Ref                       | Ref                 | Ref                 |
|                                     | Semi-urban                       | 0.98<br>[0.89,1.08] | 1.07<br>[0.98,1.17] | 0.37 [0.13, 0.97] | 0.96 [0.45, 1.98]    | N/A                   | N/A                 | 1.06<br>[0.62,1.83]       | 0.92<br>[0.75,1.13] | 1.05<br>[0.93,1.18] |
|                                     | Rural                            | 1.05<br>[0.97,1.14] | 1.05<br>[0.96,1.13] | 0.35 [0.09, 1.07] | 0.87 [0.41, 1.78]    | 0.87<br>[0.74,1.01]   | 0.84<br>[0.74,0.95] | 2.31<br>[1.14,4.67]       | 0.81<br>[0.63,1.04] | 0.89<br>[0.78,1.03] |
| <b>ANXIETY</b>                      |                                  |                     |                     |                   |                      |                       |                     |                           |                     |                     |
| Exposure                            |                                  | DNBC                |                     | TEMPO             |                      | Constances            |                     | UCL Covid-19 Social Study |                     |                     |
|                                     |                                  | Young people        | Women               | Men               | Women                | Men                   | Women               | Young people              | Men                 | Women               |
| <b>Access to outdoor facilities</b> | Yes                              | Ref                 | Ref                 | N/A               | N/A                  | Ref                   | Ref                 | Ref                       | Ref                 | Ref                 |
|                                     | No                               | 1.32<br>[1.08,1.61] | 1.19<br>[0.81,1.74] | N/A               | N/A                  | 1.80 [1.41, 2.29]     | 1.20 [0.98, 1.47]   | 1.48<br>[0.70,3.14]       | 1.28<br>[0.89,1.83] | 1.22<br>[1.00,1.49] |
| <b>Household density</b>            | <43 m2                           | Ref                 | Ref                 | N/A               | N/A                  | Ref                   | Ref                 | N/A                       | N/A                 | N/A                 |
|                                     | ≥43 m2                           | 0.89<br>[0.83,0.96] | 0.98<br>[0.91,1.05] | N/A               | N/A                  | 1.05<br>[0.74,1.49]   | 0.71<br>[0.63,0.81] | N/A                       | N/A                 | N/A                 |
| <b>Household crowding</b>           | Ideal                            | N/A                 | N/A                 | N/A               | N/A                  | Ref                   | Ref                 | Ref                       | Ref                 | Ref                 |
|                                     | Crowded                          | N/A                 | N/A                 | N/A               | N/A                  | 1.37<br>[0.94,1.98]   | 1.22<br>[0.93,1.61] | 1.51<br>[0.71,3.19]       | 1.38<br>[0.81,2.36] | 1.30<br>[0.97,1.74] |
|                                     | Underoccupied                    | N/A                 | N/A                 | N/A               | N/A                  | 0.61<br>[0.52,0.73]   | 0.76<br>[0.67,0.86] | 1.31<br>[0.63,2.72]       | 0.48<br>[0.34,0.68] | 0.59<br>[0.50,0.69] |
| <b>Household composition</b>        | Adults-only households           | Ref                 | Ref                 | N/A               | N/A                  | Ref                   | Ref                 | Ref                       | Ref                 | Ref                 |
|                                     | Households with children         | 0.95<br>[0.85,1.06] | 1.04<br>[0.90,1.20] | N/A               | N/A                  | 1.41<br>[1.17,1.70]   | 1.10<br>[0.88,1.38] | 0.72<br>[0.35,1.47]       | 1.19<br>[0.83,1.69] | 1.38<br>[1.19,1.60] |
|                                     | Single households (living alone) | 1.20<br>[1.00,1.45] | 1.13<br>[0.90,1.43] | N/A               | N/A                  | 2.02<br>[1.63,2.51]   | 1.08<br>[0.81,1.43] | 2.27<br>[0.65,7.90]       | 0.96<br>[0.69,1.34] | 0.80<br>[0.68,0.94] |
| <b>Dwelling type</b>                | House                            | N/A                 | N/A                 | N/A               | N/A                  | Ref                   | Ref                 | Ref                       | Ref                 | Ref                 |
|                                     | Apartment                        | N/A                 | N/A                 | N/A               | N/A                  | 1.63<br>[1.38,1.93]   | 1.02<br>[0.90,1.16] | 0.58<br>[0.26,1.30]       | 0.89<br>[0.61,1.31] | 1.05<br>[0.86,1.27] |
|                                     | Urban                            | Ref                 | Ref                 | N/A               | N/A                  | Ref                   | Ref                 | Ref                       | Ref                 | Ref                 |

|                                     |                                  |                     |                     |                   |                   |                     |                     |                                  |                     |                     |
|-------------------------------------|----------------------------------|---------------------|---------------------|-------------------|-------------------|---------------------|---------------------|----------------------------------|---------------------|---------------------|
| <b>Urbanicity</b>                   | Semi-urban                       | 0.88<br>[0.80,0.97] | 1.03<br>[0.94,1.13] | N/A               | N/A               | N/A                 | N/A                 | 0.84<br>[0.44,1.62]              | 0.99<br>[0.70,1.40] | 1.05<br>[0.90,1.22] |
|                                     | Rural                            | 0.93<br>[0.84,1.02] | 1.03<br>[0.93,1.15] | N/A               | N/A               | 0.75<br>[0.59,0.94] | 1.05<br>[0.91,1.22] | 1.28<br>[0.57,2.88]              | 0.91<br>[0.59,1.39] | 0.88<br>[0.73,1.06] |
| <b>LIFE SATISFACTION</b>            |                                  |                     |                     |                   |                   |                     |                     |                                  |                     |                     |
| <b>Exposure</b>                     |                                  | <b>DNBC</b>         |                     | <b>TEMPO</b>      |                   | <b>Constances</b>   |                     | <b>UCL Covid-19 Social Study</b> |                     |                     |
|                                     |                                  | <b>Young people</b> | <b>Women</b>        | <b>Men</b>        | <b>Women</b>      | <b>Men</b>          | <b>Women</b>        | <b>Young people</b>              | <b>Men</b>          | <b>Women</b>        |
| <b>Access to outdoor facilities</b> | Yes                              | Ref                 | Ref                 | Ref               | Ref               | N/A                 | N/A                 | Ref                              | Ref                 | Ref                 |
|                                     | No                               | 1.1 [0.89, 1.35]    | 1.35 [0.92, 2.00]   | 0.48 [0.22, 1.06] | 0.68 [0.37, 1.25] | N/A                 | N/A                 | 1.18 [0.56, 2.5]                 | 1.35 [1.06, 1.72]   | 1.33 [1.12, 1.56]   |
| <b>Household density</b>            | <43 m2                           | Ref                 | Ref                 | N/A               | N/A               | N/A                 | N/A                 | N/A                              | N/A                 | N/A                 |
|                                     | ≥43 m2                           | 0.93 [0.85, 1.00]   | 1.01 [0.91, 1.11]   | N/A               | N/A               | N/A                 | N/A                 | N/A                              | N/A                 | N/A                 |
| <b>Household crowding</b>           | Ideal                            | N/A                 | N/A                 | N/A               | N/A               | N/A                 | N/A                 | Ref                              | Ref                 | Ref                 |
|                                     | Crowded                          | N/A                 | N/A                 | N/A               | N/A               | N/A                 | N/A                 | 1.12 [0.56, 2.27]                | 1.64 [1.02, 2.63]   | 1.43 [1.10, 1.89]   |
|                                     | Underoccupied                    | N/A                 | N/A                 | N/A               | N/A               | N/A                 | N/A                 | 0.93 [0.45, 1.92]                | 0.75 [0.61, 0.83]   | 0.67 [0.58, 0.76]   |
| <b>Household composition</b>        | Adults-only households           | Ref                 | Ref                 | Ref               | Ref               | N/A                 | N/A                 | Ref                              | Ref                 | Ref                 |
|                                     | Households with children         | 1.03 [0.92, 1.15]   | 1.08 [0.93, 1.23]   | 0.69 [0.26, 2.00] | 0.85 [0.38, 2.08] | N/A                 | N/A                 | 1.23 [0.58, 2.56]                | 1.41 [1.12, 1.75]   | 1.14 [1.01, 1.28]   |
|                                     | Single households (living alone) | 1.28 [1.06, 1.56]   | 1.75 [1.39, 2.22]   | 1.19 [0.36, 4.00] | 2.17 [0.65, 7.14] | N/A                 | N/A                 | 2.44 [0.67, 9.09]                | 1.79 [1.45, 2.22]   | 1.23 [1.09, 1.39]   |
| <b>Dwelling type</b>                | House                            | N/A                 | N/A                 | Ref               | Ref               | N/A                 | N/A                 | Ref                              | Ref                 | Ref                 |
|                                     | Apartment                        | N/A                 | N/A                 | 1.72 [0.78, 3.85] | 1.37 [0.72, 2.5]  | N/A                 | N/A                 | 1.2 [0.55, 2.63]                 | 0.83 [0.65, 1.08]   | 0.93 [0.79, 1.08]   |
| <b>Urbanicity</b>                   | Urban                            | Ref                 | Ref                 | Ref               | Ref               | N/A                 | N/A                 | Ref                              | Ref                 | Ref                 |
|                                     | Semi-urban                       | 1.11 [0.91, 1.12]   | 1.04 [0.94, 1.14]   | 0.77 [0.24, 2.13] | 0.76 [0.25, 1.96] | N/A                 | N/A                 | 1.12 [0.60, 2.08]                | 0.79 [0.65, 0.95]   | 1.16 [1.01, 1.33]   |
|                                     | Rural                            | 1.06 [0.98, 1.16]   | 0.98 [0.90, 1.06]   | 0.4 [0.06, 1.56]  | 1.39 [0.58, 3.13] | N/A                 | N/A                 | 1.85 [0.85, 4.00]                | 0.58 [0.46, 0.74]   | 0.85 [0.75, 0.98]   |
