# Supplementary material
Source: PubMed Central journal article supplement (PMC8979944)
Supplement: 41598_2022_9316_MOESM6_ESM.pdf [file 41598_2022_9316_MOESM6_ESM.pdf]

**Supplemental Table 3. Odds ratio of reporting severe loneliness / severe anxiety / low life satisfaction compared to the reference values in the four cohorts (N=69,136). Model 1.**

| <b>LONELINESS</b>                   |                                  |                     |                     |                   |                      |                      |                     |                                  |                     |                     |
|-------------------------------------|----------------------------------|---------------------|---------------------|-------------------|----------------------|----------------------|---------------------|----------------------------------|---------------------|---------------------|
| <b>Exposure</b>                     |                                  | <b>DNBC</b>         |                     | <b>TEMPO</b>      |                      | <b>Constances</b>    |                     | <b>UCL Covid-19 Social Study</b> |                     |                     |
|                                     |                                  | <b>Young people</b> | <b>Women</b>        | <b>Men</b>        | <b>Women</b>         | <b>Men</b>           | <b>Women</b>        | <b>Young people</b>              | <b>Men</b>          | <b>Women</b>        |
| <b>Access to outdoor facilities</b> | Yes                              | Ref                 | Ref                 | Ref               | Ref                  | Ref                  | Ref                 | Ref                              | Ref                 | Ref                 |
|                                     | No                               | 1.33<br>[1.08,1.64] | 3.23<br>[1.84,5.67] | 0.52 [0.26, 1.05] | 1.44<br>[0.86, 2.45] | 2.13<br>[1.80,2.52]  | 1.87<br>[1.61,2.17] | 2.54<br>[1.19,5.44]              | 1.29<br>[0.99,1.67] | 1.13<br>[0.95,1.35] |
| <b>Household density</b>            | <43 m2                           | Ref                 | Ref                 | N/A               | N/A                  | Ref                  | Ref                 | N/A                              | N/A                 | N/A                 |
|                                     | ≥43 m2                           | 0.96<br>[0.89,1.04] | 1.25<br>[1.16,1.35] | N/A               | N/A                  | 1.08<br>[0.94,1.25]  | 1.00<br>[0.88,1.12] | N/A                              | N/A                 | N/A                 |
| <b>Household crowding</b>           | Ideal                            | N/A                 | N/A                 | N/A               | N/A                  | Ref                  | Ref                 | Ref                              | Ref                 | Ref                 |
|                                     | Crowded                          | N/A                 | N/A                 | N/A               | N/A                  | 1.40<br>[1.09,1.79]  | 1.20<br>[0.96,1.50] | 0.58<br>[0.29,1.16]              | 1.13<br>[0.77,1.64] | 1.25<br>[0.96,1.62] |
|                                     | Underoccupied                    | N/A                 | N/A                 | N/A               | N/A                  | 0.44<br>[0.38,0.50]  | 0.57<br>[0.52,0.64] | 1.00<br>[0.54,1.88]              | 0.75<br>[0.59,0.94] | 0.79<br>[0.69,0.90] |
| <b>Household composition</b>        | Adults-only households           | Ref                 | Ref                 | Ref               | Ref                  | Ref                  | Ref                 | Ref                              | Ref                 | Ref                 |
|                                     | Households with children         | 0.92<br>[0.82,1.03] | 0.84<br>[0.71,0.99] | 0.67 [0.27, 1.68] | 1.61 [0.77, 3.56]    | 1.00<br>[0.84,1.20]  | 1.17<br>[0.91,1.49] | 1.98<br>[0.96,4.09]              | 0.92<br>[0.70,1.19] | 1.01<br>[0.88,1.15] |
|                                     | Single households (living alone) | 1.78<br>[1.47,2.16] | 2.53<br>[1.97,3.24] | 0.89 [0.3, 2.67]  | 4 [1.26, 13.07]      | 9.40<br>[8.16,10.83] | 7.38<br>[6.04,9.02] | 2.70<br>[0.91,8.01]              | 3.50<br>[2.81,4.36] | 2.58<br>[2.23,2.98] |
| <b>Dwelling type</b>                | House                            | N/A                 | N/A                 | Ref               | Ref                  | Ref                  | Ref                 | Ref                              | Ref                 | Ref                 |
|                                     | Apartment                        | N/A                 | N/A                 | 1.63 [0.8, 3.32]  | 0.63 [0.36, 1.07]    | 2.27<br>[2.02,2.57]  | 1.83<br>[1.66,2.01] | 0.70<br>[0.31,1.54]              | 0.87<br>[0.68,1.13] | 0.94<br>[0.80,1.11] |
| <b>Urbanicity</b>                   | Urban                            | Ref                 | Ref                 | Ref               | Ref                  | Ref                  | Ref                 | Ref                              | Ref                 | Ref                 |
|                                     | Semi-urban                       | 0.92<br>[0.83,1.01] | 1.05<br>[0.95,1.16] | 0.37 [0.12, 0.95] | 0.85 [0.39, 1.8]     | N/A                  | N/A                 | 1.20<br>[0.67,2.14]              | 1.07<br>[0.88,1.31] | 1.03<br>[0.91,1.16] |
|                                     | Rural                            | 0.97<br>[0.90,1.06] | 1.01<br>[0.93,1.10] | 0.36 [0.09, 1.15] | 0.83 [0.38, 1.75]    | 0.88<br>[0.75,1.04]  | 0.84<br>[0.74,0.95] | 2.70<br>[1.27,5.74]              | 1.01<br>[0.77,1.31] | 0.91<br>[0.79,1.06] |
| <b>ANXIETY</b>                      |                                  |                     |                     |                   |                      |                      |                     |                                  |                     |                     |
| <b>Exposure</b>                     |                                  | <b>DNBC</b>         |                     | <b>TEMPO</b>      |                      | <b>Constances</b>    |                     | <b>UCL Covid-19 Social Study</b> |                     |                     |
|                                     |                                  | <b>Young people</b> | <b>Women</b>        | <b>Men</b>        | <b>Women</b>         | <b>Men</b>           | <b>Women</b>        | <b>Young people</b>              | <b>Men</b>          | <b>Women</b>        |
| <b>Access to outdoor facilities</b> | Yes                              | Ref                 | Ref                 | N/A               | N/A                  | Ref                  | Ref                 | Ref                              | Ref                 | Ref                 |
|                                     | No                               | 1.39<br>[1.13,1.71] | 1.20<br>[0.80,1.80] | N/A               | N/A                  | 1.55 [1.21, 1.99]    | 1.12<br>[0.91,1.38] | 1.48<br>[0.71,3.08]              | 1.33<br>[0.92,1.92] | 1.14<br>[0.93,1.39] |
| <b>Household density</b>            | <43 m2                           | Ref                 | Ref                 | N/A               | N/A                  | Ref                  | Ref                 | N/A                              | N/A                 | N/A                 |
|                                     | ≥43 m2                           | 0.88<br>[0.81,0.95] | 0.95<br>[0.88,1.02] | N/A               | N/A                  | 0.93 [0.77, 1.13]    | 0.85 [0.74, 0.97]   | N/A                              | N/A                 | N/A                 |
| <b>Household crowding</b>           | Ideal                            | N/A                 | N/A                 | N/A               | N/A                  | Ref                  | Ref                 | Ref                              | Ref                 | Ref                 |
|                                     | Crowded                          | N/A                 | N/A                 | N/A               | N/A                  | 1.26<br>[0.87,1.82]  | 1.13<br>[0.85,1.49] | 1.64<br>[0.76,3.52]              | 1.19<br>[0.66,2.16] | 1.07<br>[0.82,1.42] |
|                                     | Underoccupied                    | N/A                 | N/A                 | N/A               | N/A                  | 0.72 [0.60 ,0.86]    | 0.83<br>[0.74,0.95] | 1.69<br>[0.79,3.58]              | 0.61<br>[0.44,0.85] | 0.71<br>[0.60,0.85] |
| <b>Household composition</b>        | Adults-only households           | Ref                 | Ref                 | N/A               | N/A                  | Ref                  | Ref                 | Ref                              | Ref                 | Ref                 |
|                                     | Households with children         | 0.96<br>[0.85,1.08] | 1.04<br>[0.89,1.22] | N/A               | N/A                  | 1.06<br>[0.86,1.30]  | 1.12<br>[0.97,1.30] | 0.53<br>[0.25,1.13]              | 0.83<br>[0.57,1.19] | 1.01<br>[0.85,1.19] |
|                                     | Single households (living alone) | 1.39<br>[1.14,1.68] | 1.16<br>[0.91,1.48] | N/A               | N/A                  | 1.74<br>[1.39,2.17]  | 0.96<br>[0.80,1.14] | 3.19<br>[0.92,11.13]             | 0.90<br>[0.63,1.27] | 0.93<br>[0.78,1.11] |
| <b>Dwelling type</b>                | House                            | N/A                 | N/A                 | N/A               | N/A                  | Ref                  | Ref                 | Ref                              | Ref                 | Ref                 |
|                                     | Apartment                        | N/A                 | N/A                 | N/A               | N/A                  | 1.46<br>[1.23,1.74]  | 0.97<br>[0.85,1.10] | 0.49<br>[0.22,1.09]              | 0.85<br>[0.56,1.28] | 1.01<br>[0.83,1.22] |
| <b>Urbanicity</b>                   | Urban                            | Ref                 | Ref                 | N/A               | N/A                  | Ref                  | Ref                 | Ref                              | Ref                 | Ref                 |
|                                     | Semi-urban                       | 0.85<br>[0.77,0.93] | 1.05<br>[0.96,1.16] | N/A               | N/A                  | N/A                  | N/A                 | 0.69<br>[0.36,1.34]              | 1.15<br>[0.83,1.59] | 1.00<br>[0.85,1.17] |

|                              | Rural                            | 0.89<br>[0.80,0.98] | 0.97<br>[0.89,1.06] | N/A               | N/A               | 0.75<br>[0.59,0.95] | 1.01<br>[0.87,1.17] | 1.14<br>[0.50,2.56]       | 1.17<br>[0.77,1.77] | 0.90<br>[0.74,1.08] |
|------------------------------|----------------------------------|---------------------|---------------------|-------------------|-------------------|---------------------|---------------------|---------------------------|---------------------|---------------------|
| <b>LIFE SATISFACTION</b>     |                                  |                     |                     |                   |                   |                     |                     |                           |                     |                     |
| Exposure                     |                                  | DNBC                |                     | TEMPO             |                   | Constances          |                     | UCL Covid-19 Social Study |                     |                     |
|                              |                                  | Young people        | Women               | Men               | Women             | Men                 | Women               | Young people              | Men                 | Women               |
| Access to outdoor facilities | Yes                              | Ref                 | Ref                 | Ref               | Ref               | N/A                 | N/A                 | Ref                       | Ref                 | Ref                 |
|                              | No                               | 1.22 [0.99, 1.52]   | 1.32 [0.88, 2.00]   | 0.47 [0.20, 1.05] | 0.67 [0.36, 1.23] | N/A                 | N/A                 | 1.18 [0.54, 2.56]         | 1.37 [1.08, 1.72]   | 1.25 [1.06, 1.49]   |
| Household density            | <43 m2                           | Ref                 | Ref                 | N/A               | N/A               | N/A                 | N/A                 | N/A                       | N/A                 | N/A                 |
|                              | ≥43 m2                           | 0.91 [0.84, 0.99]   | 0.97 [0.87, 1.09]   | N/A               | N/A               | N/A                 | N/A                 | N/A                       | N/A                 | N/A                 |
| Household crowding           | Ideal                            | N/A                 | N/A                 | N/A               | N/A               | N/A                 | N/A                 | Ref                       | Ref                 | Ref                 |
|                              | Crowded                          | N/A                 | N/A                 | N/A               | N/A               | N/A                 | N/A                 | 1.2 [0.58, 2.50]          | 1.52 [0.96, 2.38]   | 1.32 [1.02, 1.69]   |
|                              | Underoccupied                    | N/A                 | N/A                 | N/A               | N/A               | N/A                 | N/A                 | 1.05 [0.51, 2.17]         | 0.87 [0.70, 1.08]   | 0.77 [0.67, 0.88]   |
| Household composition        | Adults-only households           | Ref                 | Ref                 | Ref               | Ref               | N/A                 | N/A                 | Ref                       | Ref                 | Ref                 |
|                              | Households with children         | 1.02 [0.90, 1.15]   | 1.15 [0.98, 1.37]   | 0.65 [0.24, 1.92] | 0.79 [0.34, 2.04] | N/A                 | N/A                 | 1.12 [0.50, 2.50]         | 1.11 [0.86, 1.41]   | 0.92 [0.81, 1.04]   |
|                              | Single households (living alone) | 1.52 [1.23, 1.85]   | 1.67 [1.32, 2.13]   | 1.18 [0.35, 4.00] | 2.13 [0.62, 7.14] | N/A                 | N/A                 | 2.70 [0.79, 9.09]         | 1.72 [1.39, 2.13]   | 1.41 [1.23, 1.59]   |
| Dwelling type                | House                            | N/A                 | N/A                 | Ref               | Ref               | N/A                 | N/A                 | Ref                       | Ref                 | Ref                 |
|                              | Apartment                        | N/A                 | N/A                 | 1.75 [0.77, 4.00] | 1.39 [0.74, 2.56] | N/A                 | N/A                 | 1.16 [0.50, 2.70]         | 0.82 [0.64, 1.05]   | 0.88 [0.76, 1.03]   |
| Urbanicity                   | Urban                            | Ref                 | Ref                 | Ref               | Ref               | N/A                 | N/A                 | Ref                       | Ref                 | Ref                 |
|                              | Semi-urban                       | 0.95 [0.85, 1.06]   | 1.05 [0.95, 1.16]   | 0.77 [0.24, 2.17] | 0.71 [0.23, 1.85] | N/A                 | N/A                 | 1.16 [0.57, 2.33]         | 0.85 [0.69, 1.03]   | 1.12 [0.98, 1.28]   |
|                              | Rural                            | 1.00 [0.92, 1.10]   | 0.98 [0.89, 1.06]   | 0.36 [0.05, 1.49] | 1.33 [0.55, 3.03] | N/A                 | N/A                 | 1.92 [0.83, 4.55]         | 0.66 [0.52, 0.84]   | 0.88 [0.78, 1.01]   |
