# Supplementary material
Source: PubMed Central journal article supplement (PMC8979944)
Supplement: 41598_2022_9316_MOESM7_ESM.pdf [file 41598_2022_9316_MOESM7_ESM.pdf]

**Supplemental Table 4. Odds ratio of reporting severe loneliness / severe anxiety / low life satisfaction compared to the reference values in the four cohorts (N=69,136). Model 2.**

| <b>LONELINESS</b>                   |                                  |                     |                     |                   |                      |                      |                     |                                  |                     |                     |
|-------------------------------------|----------------------------------|---------------------|---------------------|-------------------|----------------------|----------------------|---------------------|----------------------------------|---------------------|---------------------|
| <b>Exposure</b>                     |                                  | <b>DNBC</b>         |                     | <b>TEMPO</b>      |                      | <b>Constances</b>    |                     | <b>UCL Covid-19 Social Study</b> |                     |                     |
|                                     |                                  | <b>Young people</b> | <b>Women</b>        | <b>Men</b>        | <b>Women</b>         | <b>Men</b>           | <b>Women</b>        | <b>Young people</b>              | <b>Men</b>          | <b>Women</b>        |
| <b>Access to outdoor facilities</b> | Yes                              | Ref                 | Ref                 | Ref               | Ref                  | Ref                  | Ref                 | Ref                              | Ref                 | Ref                 |
|                                     | No                               | 1.29<br>[1.05,1.59] | 1.99<br>[1.31,3.02] | 0.54 [0.27, 1.09] | 1.43<br>[0.85, 2.44] | 2.06<br>[1.74,2.43]  | 1.84<br>[1.58,2.13] | 2.78<br>[1.29,6.00]              | 1.28<br>[0.99,1.66] | 1.09<br>[0.91,1.31] |
| <b>Household density</b>            | <43 m2                           | Ref                 | Ref                 | N/A               | N/A                  | Ref                  | Ref                 | N/A                              | N/A                 | N/A                 |
|                                     | ≥43 m2                           | 0.97<br>[0.90,1.05] | 1.24<br>[1.15,1.34] | N/A               | N/A                  | 1.08<br>[0.94,1.25]  | 1.00<br>[0.89,1.13] | N/A                              | N/A                 | N/A                 |
| <b>Household crowding</b>           | Ideal                            | N/A                 | N/A                 | N/A               | N/A                  | Ref                  | Ref                 | Ref                              | Ref                 | Ref                 |
|                                     | Crowded                          | N/A                 | N/A                 | N/A               | N/A                  | 1.37<br>[1.07,1.76]  | 1.18<br>[0.94,1.48] | 0.54<br>[0.27,1.10]              | 1.18<br>[0.81,1.72] | 1.27<br>[0.98,1.63] |
|                                     | Underoccupied                    | N/A                 | N/A                 | N/A               | N/A                  | 0.44<br>[0.39,0.50]  | 0.58<br>[0.52,0.64] | 0.90<br>[0.48,1.69]              | 0.76<br>[0.61,0.96] | 0.83<br>[0.72,0.96] |
| <b>Household composition</b>        | Adults-only households           | Ref                 | Ref                 | Ref               | Ref                  | Ref                  | Ref                 | Ref                              | Ref                 | Ref                 |
|                                     | Households with children         | 0.93<br>[0.83,1.05] | 0.84<br>[0.71,0.99] | 0.7 [0.28, 1.79]  | 1.73 [0.82, 3.88]    | 1.03<br>[0.86,1.23]  | 1.17<br>[0.91,1.50] | 2.05<br>[1.00,4.21]              | 0.91<br>[0.69,1.19] | 1.05<br>[0.92,1.20] |
|                                     | Single households (living alone) | 1.72<br>[1.42,2.09] | 2.45<br>[1.91,3.15] | 0.9 [0.3, 2.74]   | 4.08 [1.27, 13.46]   | 9.35<br>[8.11,10.78] | 7.34<br>[6.00,8.97] | 2.15<br>[0.86,5.39]              | 3.43<br>[2.75,4.27] | 2.67<br>[2.33,3.06] |
| <b>Dwelling type</b>                | House                            | N/A                 | N/A                 | Ref               | Ref                  | Ref                  | Ref                 | Ref                              | Ref                 | Ref                 |
|                                     | Apartment                        | N/A                 | N/A                 | 1.55 [0.76, 3.17] | 0.64 [0.37, 1.09]    | 2.21<br>[1.96,2.50]  | 1.82<br>[1.65,2.00] | 0.64<br>[0.28,1.47]              | 0.82<br>[0.63,1.06] | 0.94<br>[0.80,1.12] |
| <b>Urbanicity</b>                   | Urban                            | Ref                 | Ref                 | Ref               | Ref                  | Ref                  | Ref                 | Ref                              | Ref                 | Ref                 |
|                                     | Semi-urban                       | 0.92<br>[0.83,1.01] | 1.05<br>[0.95,1.16] | 0.36 [0.12, 0.95] | 0.88 [0.4, 1.88]     | N/A                  | N/A                 | 1.02<br>[0.56,1.84]              | 1.09<br>[0.89,1.35] | 1.04<br>[0.92,1.17] |
|                                     | Rural                            | 0.98<br>[0.90,1.06] | 1.00<br>[0.92,1.09] | 0.37 [0.09, 1.19] | 0.88 [0.4, 1.85]     | 0.89<br>[0.76,1.05]  | 0.84<br>[0.74,0.95] | 2.38<br>[1.12,5.09]              | 0.99<br>[0.76,1.30] | 0.90<br>[0.78,1.05] |
| <b>ANXIETY</b>                      |                                  |                     |                     |                   |                      |                      |                     |                                  |                     |                     |
| <b>Exposure</b>                     |                                  | <b>DNBC</b>         |                     | <b>TEMPO</b>      |                      | <b>Constances</b>    |                     | <b>UCL Covid-19 Social Study</b> |                     |                     |
|                                     |                                  | <b>Young people</b> | <b>Women</b>        | <b>Men</b>        | <b>Women</b>         | <b>Men</b>           | <b>Women</b>        | <b>Young people</b>              | <b>Men</b>          | <b>Women</b>        |
| <b>Access to outdoor facilities</b> | Yes                              | Ref                 | Ref                 | N/A               | N/A                  | Ref                  | Ref                 | Ref                              | Ref                 | Ref                 |
|                                     | No                               | 1.22<br>[0.99,1.51] | 1.10<br>[0.73,1.66] | N/A               | N/A                  | 1.46<br>[1.14,1.88]  | 1.09<br>[0.88,1.34] | 1.72<br>[0.79,3.72]              | 1.32<br>[0.89,1.95] | 1.11<br>[0.90,1.37] |
| <b>Household density</b>            | <43 m2                           | Ref                 | Ref                 | N/A               | N/A                  | Ref                  | Ref                 | N/A                              | N/A                 | N/A                 |
|                                     | ≥43 m2                           | 0.90<br>[0.83,0.97] | 0.94<br>[0.87,1.01] | N/A               | N/A                  | 0.93 [0.76, 1.13]    | 0.85 [0.74, 0.97]   | N/A                              | N/A                 | N/A                 |
| <b>Household crowding</b>           | Ideal                            | N/A                 | N/A                 | N/A               | N/A                  | Ref                  | Ref                 | Ref                              | Ref                 | Ref                 |
|                                     | Crowded                          | N/A                 | N/A                 | N/A               | N/A                  | 1.21<br>[0.84,1.76]  | 1.10<br>[0.83,1.46] | 1.55<br>[0.70,3.44]              | 1.18<br>[0.61,2.29] | 1.09<br>[0.82,1.46] |
|                                     | Underoccupied                    | N/A                 | N/A                 | N/A               | N/A                  | 0.75<br>[0.62,0.89]  | 0.84<br>[0.74,0.96] | 1.34<br>[0.64,2.83]              | 0.59<br>[0.41,0.86] | 0.76<br>[0.64,0.91] |
| <b>Household composition</b>        | Adults-only households           | Ref                 | Ref                 | N/A               | N/A                  | Ref                  | Ref                 | Ref                              | Ref                 | Ref                 |
|                                     | Households with children         | 1.00<br>[0.89,1.13] | 1.05<br>[0.89,1.23] | N/A               | N/A                  | 1.10<br>[0.89,1.36]  | 1.14<br>[0.98,1.32] | 0.58<br>[0.27,1.27]              | 0.85<br>[0.58,1.24] | 1.09<br>[0.92,1.29] |
|                                     | Single households (living alone) | 1.19<br>[0.98,1.45] | 1.08<br>[0.84,1.38] | N/A               | N/A                  | 1.69<br>[1.35,2.11]  | 0.94<br>[0.79,1.12] | 2.07<br>[0.72,5.91]              | 0.75<br>[0.52,1.08] | 0.78<br>[0.65,0.94] |
| <b>Dwelling type</b>                | House                            | N/A                 | N/A                 | N/A               | N/A                  | Ref                  | Ref                 | Ref                              | Ref                 | Ref                 |
|                                     | Apartment                        | N/A                 | N/A                 | N/A               | N/A                  | 1.39<br>[1.17,1.66]  | 0.96<br>[0.84,1.08] | 0.40<br>[0.17,0.94]              | 0.75<br>[0.48,1.16] | 1.00<br>[0.82,1.22] |
| <b>Urbanicity</b>                   | Urban                            | Ref                 | Ref                 | N/A               | N/A                  | Ref                  | Ref                 | Ref                              | Ref                 | Ref                 |
|                                     | Semi-urban                       | 0.84<br>[0.76,0.93] | 1.06<br>[0.96,1.17] | N/A               | N/A                  | N/A                  | N/A                 | 0.55<br>[0.27,1.10]              | 1.25<br>[0.86,1.81] | 1.01<br>[0.87,1.19] |

|                                     | Rural                            | 0.91<br>[0.82,1.01] | 0.96<br>[0.88,1.04] | N/A               | N/A               | 0.76<br>[0.60,0.96] | 1.02<br>[0.88,1.18] | 0.99<br>[0.40,2.46]       | 1.17<br>[0.75,1.81] | 0.87<br>[0.72,1.06] |
|-------------------------------------|----------------------------------|---------------------|---------------------|-------------------|-------------------|---------------------|---------------------|---------------------------|---------------------|---------------------|
| <b>LIFE SATISFACTION</b>            |                                  |                     |                     |                   |                   |                     |                     |                           |                     |                     |
| Exposure                            |                                  | DNBC                |                     | TEMPO             |                   | Constances          |                     | UCL Covid-19 Social Study |                     |                     |
|                                     |                                  | Young people        | Women               | Men               | Women             | Men                 | Women               | Young people              | Men                 | Women               |
| <b>Access to outdoor facilities</b> | Yes                              | Ref                 | Ref                 | Ref               | Ref               | N/A                 | N/A                 | Ref                       | Ref                 | Ref                 |
|                                     | No                               | 1.14 [0.92, 1.41]   | 1.27 [0.83, 1.89]   | 0.47 [0.21, 1.06] | 0.63 [0.34, 1.18] | N/A                 | N/A                 | 1.32 [0.61, 2.86]         | 1.35 [1.06, 1.72]   | 1.23 [1.04, 1.47]   |
| <b>Household density</b>            | <43 m2                           | Ref                 | Ref                 | N/A               | N/A               | N/A                 | N/A                 | N/A                       | N/A                 | N/A                 |
|                                     | ≥43 m2                           | 0.93 [0.85, 1.00]   | 0.96 [0.86, 1.08]   | N/A               | N/A               | N/A                 | N/A                 | N/A                       | N/A                 | N/A                 |
| <b>Household crowding</b>           | Ideal                            | N/A                 | N/A                 | N/A               | N/A               | N/A                 | N/A                 | Ref                       | Ref                 | Ref                 |
|                                     | Crowded                          | N/A                 | N/A                 | N/A               | N/A               | N/A                 | N/A                 | 1.16 [0.54, 2.44]         | 1.23 [0.81, 1.89]   | 1.33 [1.03, 1.69]   |
|                                     | Underoccupied                    | N/A                 | N/A                 | N/A               | N/A               | N/A                 | N/A                 | 0.88 [0.41, 1.89]         | 0.9 [0.72, 1.11]    | 0.81 [0.70, 0.92]   |
| <b>Household composition</b>        | Adults-only households           | Ref                 | Ref                 | Ref               | Ref               | N/A                 | N/A                 | Ref                       | Ref                 | Ref                 |
|                                     | Households with children         | 1.04 [0.93, 1.18]   | 1.18 [0.99, 1.39]   | 0.68 [0.24, 2.04] | 0.88 [0.37, 2.27] | N/A                 | N/A                 | 1.14 [0.50, 2.56]         | 1.12 [0.88, 1.43]   | 0.96 [0.84, 1.09]   |
|                                     | Single households (living alone) | 1.39 [1.12, 1.69]   | 1.61 [1.27, 2.08]   | 1.16 [0.34, 4.00] | 2.17 [0.63, 7.69] | N/A                 | N/A                 | 2.33 [0.89, 5.88]         | 1.61 [1.3, 2.00]    | 1.33 [1.18, 1.52]   |
| <b>Dwelling type</b>                | House                            | N/A                 | N/A                 | Ref               | Ref               | N/A                 | N/A                 | Ref                       | Ref                 | Ref                 |
|                                     | Apartment                        | N/A                 | N/A                 | 1.72 [0.75, 4.00] | 1.49 [0.79, 2.78] | N/A                 | N/A                 | 1.00 [0.43, 2.33]         | 0.79 [0.62, 1.02]   | 0.88 [0.75, 1.02]   |
| <b>Urbanicity</b>                   | Urban                            | Ref                 | Ref                 | Ref               | Ref               | N/A                 | N/A                 | Ref                       | Ref                 | Ref                 |
|                                     | Semi-urban                       | 0.95 [0.85, 1.06]   | 1.05 [0.96, 1.16]   | 0.78 [0.24, 2.17] | 0.68 [0.22, 1.79] | N/A                 | N/A                 | 0.91 [0.44, 1.85]         | 0.86 [0.70, 1.05]   | 1.14 [0.98, 1.30]   |
|                                     | Rural                            | 1.02 [0.93, 1.11]   | 0.97 [0.89, 1.06]   | 0.38 [0.05, 1.61] | 1.41 [0.57, 3.23] | N/A                 | N/A                 | 1.72 [0.72, 4.17]         | 0.65 [0.51, 0.83]   | 0.87 [0.76, 1.00]   |
