# Supplementary material
Source: PubMed Central journal article supplement (PMC8979944)
Supplement: 41598_2022_9316_MOESM8_ESM.pdf [file 41598_2022_9316_MOESM8_ESM.pdf]

**Supplemental Table 5. Odds ratio of reporting severe loneliness / severe anxiety / low life satisfaction compared to the reference values in the four cohorts (N=69,136). Model 3.**

| <b>LONELINESS</b>                   |                                  |                     |                     |                      |                      |                      |                     |                                  |                     |                     |
|-------------------------------------|----------------------------------|---------------------|---------------------|----------------------|----------------------|----------------------|---------------------|----------------------------------|---------------------|---------------------|
| <b>Exposure</b>                     |                                  | <b>DNBC</b>         |                     | <b>TEMPO</b>         |                      | <b>Constances</b>    |                     | <b>UCL Covid-19 Social Study</b> |                     |                     |
|                                     |                                  | <b>Young people</b> | <b>Women</b>        | <b>Men</b>           | <b>Women</b>         | <b>Men</b>           | <b>Women</b>        | <b>Young people</b>              | <b>Men</b>          | <b>Women</b>        |
| <b>Access to outdoor facilities</b> | Yes                              | Ref                 | Ref                 | Ref                  | Ref                  | Ref                  | Ref                 | Ref                              | Ref                 | Ref                 |
|                                     | No                               | 1.17<br>[0.90,1.53] | 3.59<br>[1.56,8.28] | 0.14<br>[0.02, 1.01] | 0.46<br>[0.09, 2.47] | 1.25<br>[1.03,1.51]  | 1.23<br>[1.04,1.46] | 2.41<br>[1.17,4.97]              | 1.10<br>[0.82,1.48] | 1.02<br>[0.84,1.25] |
| <b>Household density</b>            | <43 m2                           | Ref                 | Ref                 | N/A                  | N/A                  | Ref                  | Ref                 | N/A                              | N/A                 | N/A                 |
|                                     | ≥43 m2                           | 0.89<br>[0.79,1.00] | 1.14<br>[0.97,1.35] | N/A                  | N/A                  | 1.36<br>[1.18,1.58]  | 1.35<br>[1.11,1.65] | N/A                              | N/A                 | N/A                 |
| <b>Household crowding</b>           | Ideal                            | N/A                 | N/A                 | N/A                  | N/A                  | Ref                  | Ref                 | Ref                              | Ref                 | Ref                 |
|                                     | Crowded                          | N/A                 | N/A                 | N/A                  | N/A                  | 1.41<br>[1.08,1.84]  | 1.28<br>[0.83,1.73] | 0.42<br>[0.21, 0.84]             | 1.07<br>[0.71,1.60] | 1.25<br>[0.94,1.67] |
|                                     | Underoccupied                    | N/A                 | N/A                 | N/A                  | N/A                  | 0.67<br>[0.57,0.79]  | 0.86<br>[0.72,1.04] | 0.76<br>[0.39,1.47]              | 0.82<br>[0.63,1.05] | 0.91<br>[0.79,1.05] |
| <b>Household composition</b>        | Adults-only households           | Ref                 | Ref                 | Ref                  | Ref                  | Ref                  | Ref                 | Ref                              | Ref                 | Ref                 |
|                                     | Households with children         | 0.91<br>[0.80,1.03] | 0.88<br>[0.74,1.04] | 0.82<br>[0.31, 2.23] | 1.58<br>[0.74, 3.57] | 1.05<br>[0.86,1.27]  | 1.20<br>[0.93,1.55] | 2.87<br>[1.39,5.92]              | 0.98<br>[0.67,1.20] | 1.05<br>[0.91,1.21] |
|                                     | Single households (living alone) | 1.69<br>[1.38,2.06] | 2.33<br>[1.81,3.00] | 0.72<br>[0.23, 2.26] | 5.4<br>[1.65, 18.1]  | 8.71<br>[7.51,10.10] | 6.99<br>[5.69,8.58] | 1.58<br>[0.63,3.96]              | 3.62<br>[2.86,4.59] | 2.72<br>[2.33,3.18] |
| <b>Dwelling type</b>                | House                            | N/A                 | N/A                 | Ref                  | Ref                  | Ref                  | Ref                 | Ref                              | Ref                 | Ref                 |
|                                     | Apartment                        | N/A                 | N/A                 | 0.16<br>[0.02, 1.24] | 0.23<br>[0.04, 1.32] | 1.71<br>[1.46,1.99]  | 1.50<br>[1.32,1.70] | 0.69<br>[0.29,1.63]              | 0.89<br>[0.67,1.19] | 0.98<br>[0.82,1.17] |
| <b>Urbanicity</b>                   | Urban                            | Ref                 | Ref                 | Ref                  | Ref                  | Ref                  | Ref                 | Ref                              | Ref                 | Ref                 |
|                                     | Semi-urban                       | 0.98<br>[0.83,1.17] | 1.07<br>[0.98,1.17] | 0.34<br>[0.11, 0.99] | 0.7<br>[0.31, 1.55]  | N/A                  | N/A                 | 1.28<br>[0.67,2.43]              | 1.13<br>[0.91,1.41] | 1.02<br>[0.90,1.16] |
|                                     | Rural                            | 0.97<br>[0.86,1.10] | 1.05<br>[0.96,1.13] | 0.34<br>[0.08, 1.2]  | 0.77<br>[0.34, 1.65] | 1.05<br>[0.89,1.26]  | 1.14<br>[0.91,1.42] | 2.43<br>[1.65,5.09]              | 1.11<br>[0.84,1.47] | 0.94<br>[0.81,1.09] |
| <b>ANXIETY</b>                      |                                  |                     |                     |                      |                      |                      |                     |                                  |                     |                     |
| <b>Exposure</b>                     |                                  | <b>DNBC</b>         |                     | <b>TEMPO</b>         |                      | <b>Constances</b>    |                     | <b>UCL Covid-19 Social Study</b> |                     |                     |
|                                     |                                  | <b>Young people</b> | <b>Women</b>        | <b>Men</b>           | <b>Women</b>         | <b>Men</b>           | <b>Women</b>        | <b>Young people</b>              | <b>Men</b>          | <b>Women</b>        |
| <b>Access to outdoor facilities</b> | Yes                              | Ref                 | Ref                 | N/A                  | N/A                  | Ref                  | Ref                 | Ref                              | Ref                 | Ref                 |
|                                     | No                               | 0.99<br>[0.75,1.30] | 1.35<br>[0.69,2.62] | N/A                  | N/A                  | 1.21 [0.92, 1.59]    | 1.12 [0.89, 1.41]   | 1.21<br>[0.53,2.79]              | 1.02<br>[0.63,1.64] | 1.03<br>[0.81,1.31] |
| <b>Household density</b>            | <43 m2                           | Ref                 | Ref                 | N/A                  | N/A                  | Ref                  | Ref                 | N/A                              | N/A                 | N/A                 |
|                                     | ≥43 m2                           | 0.76<br>[0.67,0.86] | 1.07<br>[0.91,1.26] | N/A                  | N/A                  | 1.02 [0.84, 1.24]    | 0.86<br>[0.75,0.99] | N/A                              | N/A                 | N/A                 |
| <b>Household crowding</b>           | Ideal                            | N/A                 | N/A                 | N/A                  | N/A                  | Ref                  | Ref                 | Ref                              | Ref                 | Ref                 |
|                                     | Crowded                          | N/A                 | N/A                 | N/A                  | N/A                  | 1.16<br>[0.79,1.70]  | 1.09<br>[0.82,1.44] | 1.89<br>[0.81,4.40]              | 0.98<br>[0.45,2.12] | 0.95<br>[0.68,1.32] |
|                                     | Underoccupied                    | N/A                 | N/A                 | N/A                  | N/A                  | 0.86<br>[0.69,1.07]  | 0.78<br>[0.68,0.91] | 2.36<br>[1.08,5.19]              | 0.62<br>[0.41,0.94] | 0.82<br>[0.68,0.98] |
| <b>Household composition</b>        | Adults-only households           | Ref                 | Ref                 | N/A                  | N/A                  | Ref                  | Ref                 | Ref                              | Ref                 | Ref                 |
|                                     | Households with children         | 0.94<br>[0.83,1.06] | 1.07<br>[0.90,1.27] | N/A                  | N/A                  | 1.18<br>[0.93,1.48]  | 1.13<br>[0.97,1.33] | 0.42<br>[0.16,1.05]              | 0.81<br>[0.51,1.28] | 1.10<br>[0.91,1.34] |
|                                     | Single households (living alone) | 1.23<br>[1.00,1.51] | 1.05<br>[0.82,1.35] | N/A                  | N/A                  | 1.55<br>[1.23,1.95]  | 0.91<br>[0.76,1.10] | 1.02<br>[0.35,2.96]              | 0.39<br>[0.26,0.58] | 0.48<br>[0.39,0.58] |
| <b>Dwelling type</b>                | House                            | N/A                 | N/A                 | N/A                  | N/A                  | Ref                  | Ref                 | Ref                              | Ref                 | Ref                 |
|                                     | Apartment                        | N/A                 | N/A                 | N/A                  | N/A                  | 1.18<br>[0.95,1.47]  | 0.82<br>[0.70,0.96] | 0.41<br>[0.16,1.02]              | 0.92<br>[0.57,1.48] | 1.08<br>[0.87,1.34] |
|                                     | Urban                            | Ref                 | Ref                 | N/A                  | N/A                  | Ref                  | Ref                 | Ref                              | Ref                 | Ref                 |

|                                     |                                  |                     |                     |                   |                   |                     |                     |                                  |                     |                     |
|-------------------------------------|----------------------------------|---------------------|---------------------|-------------------|-------------------|---------------------|---------------------|----------------------------------|---------------------|---------------------|
| <b>Urbanicity</b>                   | Semi-urban                       | 0.87<br>[0.75,1.01] | 1.03<br>[0.94,1.13] | N/A               | N/A               | N/A                 | N/A                 | 0.59<br>[0.28,1.23]              | 1.29<br>[0.85,1.97] | 0.95<br>[0.79,1.13] |
|                                     | Rural                            | 0.98<br>[0.84,1.14] | 1.03<br>[0.93,1.15] | N/A               | N/A               | 0.83<br>[0.64,1.06] | 1.02<br>[0.87,1.19] | 0.56<br>[0.21,1.48]              | 1.38<br>[0.83,2.30] | 0.91<br>[0.74,1.12] |
| <b>LIFE SATISFACTION</b>            |                                  |                     |                     |                   |                   |                     |                     |                                  |                     |                     |
| <b>Exposure</b>                     |                                  | <b>DNBC</b>         |                     | <b>TEMPO</b>      |                   | <b>Constances</b>   |                     | <b>UCL Covid-19 Social Study</b> |                     |                     |
|                                     |                                  | <b>Young people</b> | <b>Women</b>        | <b>Men</b>        | <b>Women</b>      | <b>Men</b>          | <b>Women</b>        | <b>Young people</b>              | <b>Men</b>          | <b>Women</b>        |
| <b>Access to outdoor facilities</b> | Yes                              | Ref                 | Ref                 | Ref               | Ref               | N/A                 | N/A                 | Ref                              | Ref                 | Ref                 |
|                                     | No                               | 1.16 [0.88, 1.54]   | 1.12 [0.55, 2.27]   | 0.12 [0.01, 1.28] | 0.32 [0.05, 2.78] | N/A                 | N/A                 | 0.83 [0.36, 1.92]                | 1.3 [1, 1.69]       | 1.22 [1.01, 1.45]   |
| <b>Household density</b>            | <43 m2                           | Ref                 | Ref                 | N/A               | N/A               | N/A                 | N/A                 | N/A                              | N/A                 | N/A                 |
|                                     | ≥43 m2                           | 0.92 [0.81, 1.04]   | 0.81 [0.65, 1.01]   | N/A               | N/A               | N/A                 | N/A                 | N/A                              | N/A                 | N/A                 |
| <b>Household crowding</b>           | Ideal                            | N/A                 | N/A                 | N/A               | N/A               | N/A                 | N/A                 | Ref                              | Ref                 | Ref                 |
|                                     | Crowded                          | N/A                 | N/A                 | N/A               | N/A               | N/A                 | N/A                 | 1.56 [0.7, 3.45]                 | 1.16 [0.74, 1.82]   | 1.25 [0.95, 1.64]   |
|                                     | Underoccupied                    | N/A                 | N/A                 | N/A               | N/A               | N/A                 | N/A                 | 0.87 [0.39, 1.92]                | 1.09 [0.85, 1.37]   | 0.87 [0.75, 1]      |
| <b>Household composition</b>        | Adults-only households           | Ref                 | Ref                 | Ref               | Ref               | N/A                 | N/A                 | Ref                              | Ref                 | Ref                 |
|                                     | Households with children         | 1.02 [0.9, 1.16]    | 1.16 [0.98, 1.37]   | 0.88 [0.29, 2.94] | 0.93 [0.39, 2.44] | N/A                 | N/A                 | 0.99 [0.42, 2.33]                | 1.22 [0.95, 1.59]   | 0.81 [0.68, 0.97]   |
|                                     | Single households (living alone) | 1.35 [1.1, 1.67]    | 1.64 [1.28, 2.13]   | 0.98 [0.27, 3.45] | 2.08 [0.58, 7.69] | N/A                 | N/A                 | 1.92 [0.64, 5.88]                | 1.12 [0.88, 1.43]   | 1.05 [0.92, 1.2]    |
| <b>Dwelling type</b>                | House                            | N/A                 | N/A                 | Ref               | Ref               | N/A                 | N/A                 | Ref                              | Ref                 | Ref                 |
|                                     | Apartment                        | N/A                 | N/A                 | 0.2 [0.02, 2.17]  | 0.45 [0.07, 4.17] | N/A                 | N/A                 | 1.35 [0.57, 3.13]                | 0.83 [0.63, 1.11]   | 0.85 [0.72, 1.01]   |
| <b>Urbanicity</b>                   | Urban                            | Ref                 | Ref                 | Ref               | Ref               | N/A                 | N/A                 | Ref                              | Ref                 | Ref                 |
|                                     | Semi-urban                       | 0.95 [0.81, 1.11]   | 1.04 [0.94, 1.14]   | 0.87 [0.23, 2.86] | 0.77 [0.23, 2.13] | N/A                 | N/A                 | 1.02 [0.48, 2.17]                | 0.78 [0.63, 0.96]   | 1.14 [0.98, 1.33]   |
|                                     | Rural                            | 0.96 [0.85, 1.1]    | 0.98 [0.9, 1.06]    | 0.4 [0.05, 1.89]  | 1.54 [0.61, 0.79] | N/A                 | N/A                 | 1.35 [0.57, 3.23]                | 0.57 [0.43, 0.75]   | 0.91 [0.78, 1.05]   |
